# Supplementary material for: On the Characteristics of Sustained Attention Test Performance
Source: Atypon-hosted journal article supplement (doi:10.1027/1015-5759/a000543), 2020-07-01
Supplement: 1015-5759_a000543_esm2.pdf [file 1015-5759_a000543_esm2.pdf]

```

GET
  FILE='C:\Users\Iris\Desktop\Resubmission_EJPA\ESM_PreviewBenefit_DATA.sav
'.
DATASET NAME DataSet1 WINDOW=FRONT.
* Encoding: UTF-8.

***Descriptives for the conditions of the modified d2 (RT + Error Rates)

DESCRIPTIVES VARIABLES=sb1_RT snb1_RT tb1_RT tnb1_RT rb1_RT rnb1_RT sb1_Err
Perc snb1_ErrPerc
      tb1_ErrPerc tnb1_ErrPerc rb1_ErrPerc rnb1_ErrPerc
  /STATISTICS=MEAN STDDEV MIN MAX.

```

## Deskriptive Statistik

### Anmerkungen

|                               |                                                                                                                                                                                                               |                                                                                 |
|-------------------------------|---------------------------------------------------------------------------------------------------------------------------------------------------------------------------------------------------------------|---------------------------------------------------------------------------------|
| Ausgabe erstellt              |                                                                                                                                                                                                               | 02-MAR-2019 10:14:11                                                            |
| Kommentare                    |                                                                                                                                                                                                               |                                                                                 |
| Eingabe                       | Daten                                                                                                                                                                                                         | C:<br>\Users\Iris\Desktop\Resub<br>mission_EJPA\ESM_Previ<br>ewBenefit_DATA.sav |
|                               | Aktiver Datensatz                                                                                                                                                                                             | DataSet1                                                                        |
|                               | Filter                                                                                                                                                                                                        | <keine>                                                                         |
|                               | Gewichtung                                                                                                                                                                                                    | <keine>                                                                         |
|                               | Aufgeteilte Datei                                                                                                                                                                                             | <keine>                                                                         |
|                               | Anzahl der Zeilen in der<br>Arbeitsdatei                                                                                                                                                                      | 100                                                                             |
| Behandlung fehlender<br>Werte | Definition von fehlenden<br>Werten                                                                                                                                                                            | Benutzerdefinierte<br>fehlende Werte werden als<br>Fehlend behandelt.           |
|                               | Verwendete Fälle                                                                                                                                                                                              | Alle nicht fehlenden Daten<br>werden verwendet.                                 |
| Syntax                        | DESCRIPTIVES<br>VARIABLES=sb1_RT<br>snb1_RT tb1_RT tnb1_RT<br>rb1_RT rnb1_RT<br>sb1_ErrPerc<br>snb1_ErrPerc<br>tb1_ErrPerc<br>tnb1_ErrPerc rb1_ErrPerc<br>rnb1_ErrPerc<br>/STATISTICS=MEAN<br>STDDEV MIN MAX. |                                                                                 |
| Ressourcen                    | Prozessorzeit                                                                                                                                                                                                 | 00:00:00,05                                                                     |
|                               | Verstrichene Zeit                                                                                                                                                                                             | 00:00:00,02                                                                     |

[DataSet1] C:\Users\Iris\Desktop\Resubmission\_EJPA\ESM\_PreviewBenefit\_DATA.  
sav

### Deskriptive Statistik

|                             | N  | Minimum | Maximum | Mittelwert | Std.-<br>Abweichung |
|-----------------------------|----|---------|---------|------------|---------------------|
| sb1_RT                      | 97 | 437,08  | 980,86  | 633,9879   | 95,54450            |
| snb1_RT                     | 97 | 511,38  | 983,57  | 702,1933   | 96,31482            |
| tb1_RT                      | 97 | 466,46  | 920,68  | 622,5581   | 85,03464            |
| tnb1_RT                     | 97 | 523,64  | 950,95  | 705,2804   | 93,99152            |
| rb1_RT                      | 97 | 123,32  | 722,59  | 352,2632   | 122,97153           |
| rnb1_RT                     | 94 | 381,30  | 901,88  | 655,1786   | 117,47460           |
| sb1_ErrPerc                 | 97 | ,00     | 21,25   | 4,5619     | 3,39002             |
| snb1_ErrPerc                | 97 | ,00     | 12,50   | 4,1624     | 3,07630             |
| tb1_ErrPerc                 | 97 | ,00     | 15,00   | 4,7938     | 3,26599             |
| tnb1_ErrPerc                | 97 | ,00     | 13,75   | 3,5309     | 3,10939             |
| rb1_ErrPerc                 | 97 | ,00     | 13,75   | 2,6289     | 2,47701             |
| rnb1_ErrPerc                | 94 | ,00     | 15,00   | 4,8404     | 3,69918             |
| Gültige Werte (Listenweise) | 94 |         |         |            |                     |

\*\*\* Repeated-measuresANOVA (stimulus arrangement + pace) for RT in the modified d2.

```
GLM sb1_RT snb1_RT tb1_RT tnb1_RT rb1_RT rnb1_RT
  /WSFACTOR=Arrangement 3 Polynomial Pace 2 Polynomial
  /METHOD=SSTYPE(3)
  /PLOT=PROFILE(Arrangement*Pace) TYPE=LINE ERRORBAR=NO MEANREFERENCE=NO YAXIS=AUTO
  /EMMEANS=TABLES(OVERALL)
  /EMMEANS=TABLES(Arrangement) COMPARE ADJ(BONFERRONI)
  /EMMEANS=TABLES(Pace) COMPARE ADJ(BONFERRONI)
  /EMMEANS=TABLES(Arrangement*Pace)
  /PRINT=DESCRIPTIVE ETASQ OPOWER
  /CRITERIA=ALPHA(.05)
  /WSDSIGN=Arrangement Pace Arrangement*Pace.
```

## Allgemeines Lineares Modell

## Anmerkungen

|                            |                                                                                                                                                                                                                                                                                                                                                                                                                                                                                              |                                                                                         |
|----------------------------|----------------------------------------------------------------------------------------------------------------------------------------------------------------------------------------------------------------------------------------------------------------------------------------------------------------------------------------------------------------------------------------------------------------------------------------------------------------------------------------------|-----------------------------------------------------------------------------------------|
| Ausgabe erstellt           |                                                                                                                                                                                                                                                                                                                                                                                                                                                                                              | 02-MAR-2019 10:14:12                                                                    |
| Kommentare                 |                                                                                                                                                                                                                                                                                                                                                                                                                                                                                              |                                                                                         |
| Eingabe                    | Daten                                                                                                                                                                                                                                                                                                                                                                                                                                                                                        | C:<br>\Users\Iris\Desktop\Resubmission_EJPA\ESM_PreviewBenefit_DATA.sav                 |
|                            | Aktiver Datensatz                                                                                                                                                                                                                                                                                                                                                                                                                                                                            | DataSet1                                                                                |
|                            | Filter                                                                                                                                                                                                                                                                                                                                                                                                                                                                                       | <keine>                                                                                 |
|                            | Gewichtung                                                                                                                                                                                                                                                                                                                                                                                                                                                                                   | <keine>                                                                                 |
|                            | Aufgeteilte Datei                                                                                                                                                                                                                                                                                                                                                                                                                                                                            | <keine>                                                                                 |
|                            | Anzahl der Zeilen in der Arbeitsdatei                                                                                                                                                                                                                                                                                                                                                                                                                                                        | 100                                                                                     |
| Behandlung fehlender Werte | Definition für "fehlend"                                                                                                                                                                                                                                                                                                                                                                                                                                                                     | Benutzerdefinierte fehlende Werte werden als fehlend behandelt.                         |
|                            | Verwendete Fälle                                                                                                                                                                                                                                                                                                                                                                                                                                                                             | Die Statistik basiert auf allen Fällen mit gültigen Daten für alle Variablen im Modell. |
| Syntax                     | <pre>GLM sb1_RT snb1_RT tb1_RT tnb1_RT rb1_RT rnb1_RT  /WSFACTOR=Arrangement 3 Polynomial Pace 2 Polynomial /METHOD=SSTYPE(3) /PLOT=PROFILE (Arrangement*Pace) TYPE=LINE ERRORBAR=NO MEANREFERENCE=NO YAXIS=AUTO /EMMEANS=TABLES (OVERALL) /EMMEANS=TABLES (Arrangement) COMPARE ADJ(BONFERRONI) /EMMEANS=TABLES (Pace) COMPARE ADJ (BONFERRONI) /EMMEANS=TABLES (Arrangement*Pace) /PRINT=DESCRIPTIVE ETASQ OPOWER /CRITERIA=ALPHA(.05)  /WSDESIGN=Arrangement Pace Arrangement*Pace.</pre> |                                                                                         |
| Ressourcen                 | Prozessorzeit                                                                                                                                                                                                                                                                                                                                                                                                                                                                                | 00:00:05,54                                                                             |
|                            | Verstrichene Zeit                                                                                                                                                                                                                                                                                                                                                                                                                                                                            | 00:00:01,85                                                                             |

## Innersubjektfaktoren

Maß: MEASURE\_1

| Arrangement | Pace | Abhängige Variable |
|-------------|------|--------------------|
| 1           | 1    | sb1_RT             |
|             | 2    | snb1_RT            |
| 2           | 1    | tb1_RT             |
|             | 2    | tnb1_RT            |
| 3           | 1    | rb1_RT             |
|             | 2    | rnb1_RT            |

## Deskriptive Statistiken

|         | Mittelwert | Std.-<br>Abweichung | N  |
|---------|------------|---------------------|----|
| sb1_RT  | 631,4500   | 90,21442            | 94 |
| snb1_RT | 701,8166   | 95,24323            | 94 |
| tb1_RT  | 622,5043   | 84,40938            | 94 |
| tnb1_RT | 705,2834   | 93,13298            | 94 |
| rb1_RT  | 352,2863   | 123,71735           | 94 |
| rnb1_RT | 655,1786   | 117,47460           | 94 |

### Multivariate Tests<sup>a</sup>

| Effekt             |                                          | Wert   | F                     | Hypothese df | Fehler df |
|--------------------|------------------------------------------|--------|-----------------------|--------------|-----------|
| Arrangement        | Pillai-Spur                              | ,854   | 269,950 <sup>b</sup>  | 2,000        | 92,000    |
|                    | Wilks-Lambda                             | ,146   | 269,950 <sup>b</sup>  | 2,000        | 92,000    |
|                    | Hotelling-Spur                           | 5,868  | 269,950 <sup>b</sup>  | 2,000        | 92,000    |
|                    | Größte charakteristische Wurzel nach Roy | 5,868  | 269,950 <sup>b</sup>  | 2,000        | 92,000    |
| Pace               | Pillai-Spur                              | ,922   | 1100,875 <sup>b</sup> | 1,000        | 93,000    |
|                    | Wilks-Lambda                             | ,078   | 1100,875 <sup>b</sup> | 1,000        | 93,000    |
|                    | Hotelling-Spur                           | 11,837 | 1100,875 <sup>b</sup> | 1,000        | 93,000    |
|                    | Größte charakteristische Wurzel nach Roy | 11,837 | 1100,875 <sup>b</sup> | 1,000        | 93,000    |
| Arrangement * Pace | Pillai-Spur                              | ,860   | 283,519 <sup>b</sup>  | 2,000        | 92,000    |
|                    | Wilks-Lambda                             | ,140   | 283,519 <sup>b</sup>  | 2,000        | 92,000    |
|                    | Hotelling-Spur                           | 6,163  | 283,519 <sup>b</sup>  | 2,000        | 92,000    |
|                    | Größte charakteristische Wurzel nach Roy | 6,163  | 283,519 <sup>b</sup>  | 2,000        | 92,000    |

### Multivariate Tests<sup>a</sup>

| Effekt             |                                          | Sig. | Partielles Eta-Quadrat | Dezent. Parameter |
|--------------------|------------------------------------------|------|------------------------|-------------------|
| Arrangement        | Pillai-Spur                              | ,000 | ,854                   | 539,900           |
|                    | Wilks-Lambda                             | ,000 | ,854                   | 539,900           |
|                    | Hotelling-Spur                           | ,000 | ,854                   | 539,900           |
|                    | Größte charakteristische Wurzel nach Roy | ,000 | ,854                   | 539,900           |
| Pace               | Pillai-Spur                              | ,000 | ,922                   | 1100,875          |
|                    | Wilks-Lambda                             | ,000 | ,922                   | 1100,875          |
|                    | Hotelling-Spur                           | ,000 | ,922                   | 1100,875          |
|                    | Größte charakteristische Wurzel nach Roy | ,000 | ,922                   | 1100,875          |
| Arrangement * Pace | Pillai-Spur                              | ,000 | ,860                   | 567,039           |
|                    | Wilks-Lambda                             | ,000 | ,860                   | 567,039           |
|                    | Hotelling-Spur                           | ,000 | ,860                   | 567,039           |
|                    | Größte charakteristische Wurzel nach Roy | ,000 | ,860                   | 567,039           |

## Multivariate Tests<sup>a</sup>

| Effekt             |                                          | Beobachtete Schärfe <sup>c</sup> |
|--------------------|------------------------------------------|----------------------------------|
| Arrangement        | Pillai-Spur                              | 1,000                            |
|                    | Wilks-Lambda                             | 1,000                            |
|                    | Hotelling-Spur                           | 1,000                            |
|                    | Größte charakteristische Wurzel nach Roy | 1,000                            |
| Pace               | Pillai-Spur                              | 1,000                            |
|                    | Wilks-Lambda                             | 1,000                            |
|                    | Hotelling-Spur                           | 1,000                            |
|                    | Größte charakteristische Wurzel nach Roy | 1,000                            |
| Arrangement * Pace | Pillai-Spur                              | 1,000                            |
|                    | Wilks-Lambda                             | 1,000                            |
|                    | Hotelling-Spur                           | 1,000                            |
|                    | Größte charakteristische Wurzel nach Roy | 1,000                            |

- a. Design: Konstanter Term  
Innersubjekt-design: Arrangement + Pace + Arrangement \* Pace
- b. Exakte Statistik
- c. Unter Verwendung von Alpha = ,05 berechnet

## Mauchly-Test auf Sphärizität<sup>a</sup>

Maß: MEASURE\_1

| Innersubjekteffekt | Mauchly-W | Approx. Chi-Quadrat | df | Sig. | Epsilon <sup>b</sup><br>Greenhouse-Geisser |
|--------------------|-----------|---------------------|----|------|--------------------------------------------|
| Arrangement        | ,672      | 36,633              | 2  | ,000 | ,753                                       |
| Pace               | 1,000     | ,000                | 0  | .    | 1,000                                      |
| Arrangement * Pace | ,536      | 57,333              | 2  | ,000 | ,683                                       |

## Mauchly-Test auf Sphärizität<sup>a</sup>

Maß: MEASURE\_1

| Innersubjekteffekt | Epsilon <sup>b</sup> |             |
|--------------------|----------------------|-------------|
|                    | Huynh-Feldt          | Untergrenze |
| Arrangement        | ,762                 | ,500        |
| Pace               | 1,000                | 1,000       |
| Arrangement * Pace | ,690                 | ,500        |

Prüft die Nullhypothese, daß sich die Fehlerkovarianz-Matrix der orthonormalisierten transformierten abhängigen Variablen proportional zur Einheitsmatrix verhält.

a. Design: Konstanter Term

Innersubjektdesign: Arrangement + Pace + Arrangement \* Pace

b. Kann zum Korrigieren der Freiheitsgrade für die gemittelten Signifikanztests verwendet werden. In der Tabelle mit den Tests der Effekte innerhalb der Subjekte werden korrigierte Tests angezeigt.

### Tests der Innersubjekteffekte

Maß: MEASURE\_1

| Quelle                   |                        | Quadratsumme vom Typ III | df      | Mittel der Quadrate |
|--------------------------|------------------------|--------------------------|---------|---------------------|
| Arrangement              | Sphärizität angenommen | 3270940,595              | 2       | 1635470,298         |
|                          | Greenhouse-Geisser     | 3270940,595              | 1,505   | 2172663,318         |
|                          | Huynh-Feldt            | 3270940,595              | 1,525   | 2145068,015         |
|                          | Untergrenze            | 3270940,595              | 1,000   | 3270940,595         |
| Fehler(Arrangement)      | Sphärizität angenommen | 709278,173               | 186     | 3813,324            |
|                          | Greenhouse-Geisser     | 709278,173               | 140,011 | 5065,863            |
|                          | Huynh-Feldt            | 709278,173               | 141,813 | 5001,521            |
|                          | Untergrenze            | 709278,173               | 93,000  | 7626,647            |
| Pace                     | Sphärizität angenommen | 3258208,183              | 1       | 3258208,183         |
|                          | Greenhouse-Geisser     | 3258208,183              | 1,000   | 3258208,183         |
|                          | Huynh-Feldt            | 3258208,183              | 1,000   | 3258208,183         |
|                          | Untergrenze            | 3258208,183              | 1,000   | 3258208,183         |
| Fehler(Pace)             | Sphärizität angenommen | 275247,672               | 93      | 2959,652            |
|                          | Greenhouse-Geisser     | 275247,672               | 93,000  | 2959,652            |
|                          | Huynh-Feldt            | 275247,672               | 93,000  | 2959,652            |
|                          | Untergrenze            | 275247,672               | 93,000  | 2959,652            |
| Arrangement * Pace       | Sphärizität angenommen | 1608529,731              | 2       | 804264,865          |
|                          | Greenhouse-Geisser     | 1608529,731              | 1,366   | 1177254,493         |
|                          | Huynh-Feldt            | 1608529,731              | 1,380   | 1165771,849         |
|                          | Untergrenze            | 1608529,731              | 1,000   | 1608529,731         |
| Fehler(Arrangement*Pace) | Sphärizität angenommen | 313330,309               | 186     | 1684,572            |
|                          | Greenhouse-Geisser     | 313330,309               | 127,070 | 2465,816            |
|                          | Huynh-Feldt            | 313330,309               | 128,321 | 2441,765            |
|                          | Untergrenze            | 313330,309               | 93,000  | 3369,143            |

## Tests der Innersubjekteffekte

Maß: MEASURE\_1

| Quelle                   |                        | F        | Sig. | Partielles Eta-<br>Quadrat |
|--------------------------|------------------------|----------|------|----------------------------|
| Arrangement              | Sphärizität angenommen | 428,883  | ,000 | ,822                       |
|                          | Greenhouse-Geisser     | 428,883  | ,000 | ,822                       |
|                          | Huynh-Feldt            | 428,883  | ,000 | ,822                       |
|                          | Untergrenze            | 428,883  | ,000 | ,822                       |
| Fehler(Arrangement)      | Sphärizität angenommen |          |      |                            |
|                          | Greenhouse-Geisser     |          |      |                            |
|                          | Huynh-Feldt            |          |      |                            |
|                          | Untergrenze            |          |      |                            |
| Pace                     | Sphärizität angenommen | 1100,875 | ,000 | ,922                       |
|                          | Greenhouse-Geisser     | 1100,875 | ,000 | ,922                       |
|                          | Huynh-Feldt            | 1100,875 | ,000 | ,922                       |
|                          | Untergrenze            | 1100,875 | ,000 | ,922                       |
| Fehler(Pace)             | Sphärizität angenommen |          |      |                            |
|                          | Greenhouse-Geisser     |          |      |                            |
|                          | Huynh-Feldt            |          |      |                            |
|                          | Untergrenze            |          |      |                            |
| Arrangement * Pace       | Sphärizität angenommen | 477,430  | ,000 | ,837                       |
|                          | Greenhouse-Geisser     | 477,430  | ,000 | ,837                       |
|                          | Huynh-Feldt            | 477,430  | ,000 | ,837                       |
|                          | Untergrenze            | 477,430  | ,000 | ,837                       |
| Fehler(Arrangement*Pace) | Sphärizität angenommen |          |      |                            |
|                          | Greenhouse-Geisser     |          |      |                            |
|                          | Huynh-Feldt            |          |      |                            |
|                          | Untergrenze            |          |      |                            |



## Tests der Innersubjekteffekte

Maß: MEASURE\_1

| Quelle                   |                        | Dezent.<br>Parameter | Beobachtete<br>Schärfe <sup>a</sup> |
|--------------------------|------------------------|----------------------|-------------------------------------|
| Arrangement              | Sphärizität angenommen | 857,766              | 1,000                               |
|                          | Greenhouse-Geisser     | 645,683              | 1,000                               |
|                          | Huynh-Feldt            | 653,989              | 1,000                               |
|                          | Untergrenze            | 428,883              | 1,000                               |
| Fehler(Arrangement)      | Sphärizität angenommen |                      |                                     |
|                          | Greenhouse-Geisser     |                      |                                     |
|                          | Huynh-Feldt            |                      |                                     |
|                          | Untergrenze            |                      |                                     |
| Pace                     | Sphärizität angenommen | 1100,875             | 1,000                               |
|                          | Greenhouse-Geisser     | 1100,875             | 1,000                               |
|                          | Huynh-Feldt            | 1100,875             | 1,000                               |
|                          | Untergrenze            | 1100,875             | 1,000                               |
| Fehler(Pace)             | Sphärizität angenommen |                      |                                     |
|                          | Greenhouse-Geisser     |                      |                                     |
|                          | Huynh-Feldt            |                      |                                     |
|                          | Untergrenze            |                      |                                     |
| Arrangement * Pace       | Sphärizität angenommen | 954,860              | 1,000                               |
|                          | Greenhouse-Geisser     | 652,332              | 1,000                               |
|                          | Huynh-Feldt            | 658,757              | 1,000                               |
|                          | Untergrenze            | 477,430              | 1,000                               |
| Fehler(Arrangement*Pace) | Sphärizität angenommen |                      |                                     |
|                          | Greenhouse-Geisser     |                      |                                     |
|                          | Huynh-Feldt            |                      |                                     |
|                          | Untergrenze            |                      |                                     |

a. Unter Verwendung von Alpha = ,05 berechnet

### Tests der Innersubjektkontraste

Maß: MEASURE\_1

| Quelle                   | Arrangement | Pace   | Quadratsumme vom Typ III | df | Mittel der Quadrate |
|--------------------------|-------------|--------|--------------------------|----|---------------------|
| Arrangement              | Linear      |        | 2494448,604              | 1  | 2494448,604         |
|                          | Quadratisch |        | 776491,991               | 1  | 776491,991          |
| Fehler(Arrangement)      | Linear      |        | 467729,713               | 93 | 5029,352            |
|                          | Quadratisch |        | 241548,460               | 93 | 2597,295            |
| Pace                     |             | Linear | 3258208,183              | 1  | 3258208,183         |
| Fehler(Pace)             |             | Linear | 275247,672               | 93 | 2959,652            |
| Arrangement * Pace       | Linear      | Linear | 1270603,216              | 1  | 1270603,216         |
|                          | Quadratisch | Linear | 337926,515               | 1  | 337926,515          |
| Fehler(Arrangement*Pace) | Linear      | Linear | 210243,297               | 93 | 2260,681            |
|                          | Quadratisch | Linear | 103087,012               | 93 | 1108,462            |

### Tests der Innersubjektkontraste

Maß: MEASURE\_1

| Quelle                   | Arrangement | Pace   | F        | Sig. | Partielles Eta-Quadrat |
|--------------------------|-------------|--------|----------|------|------------------------|
| Arrangement              | Linear      |        | 495,978  | ,000 | ,842                   |
|                          | Quadratisch |        | 298,962  | ,000 | ,763                   |
| Fehler(Arrangement)      | Linear      |        |          |      |                        |
|                          | Quadratisch |        |          |      |                        |
| Pace                     |             | Linear | 1100,875 | ,000 | ,922                   |
| Fehler(Pace)             |             | Linear |          |      |                        |
| Arrangement * Pace       | Linear      | Linear | 562,045  | ,000 | ,858                   |
|                          | Quadratisch | Linear | 304,861  | ,000 | ,766                   |
| Fehler(Arrangement*Pace) | Linear      | Linear |          |      |                        |
|                          | Quadratisch | Linear |          |      |                        |

### Tests der Innersubjektkontraste

Maß: MEASURE\_1

| Quelle                   | Arrangement | Pace   | Dezent.<br>Parameter | Beobachtete<br>Schärfe <sup>a</sup> |
|--------------------------|-------------|--------|----------------------|-------------------------------------|
| Arrangement              | Linear      |        | 495,978              | 1,000                               |
|                          | Quadratisch |        | 298,962              | 1,000                               |
| Fehler(Arrangement)      | Linear      |        |                      |                                     |
|                          | Quadratisch |        |                      |                                     |
| Pace                     |             | Linear | 1100,875             | 1,000                               |
| Fehler(Pace)             |             | Linear |                      |                                     |
| Arrangement * Pace       | Linear      | Linear | 562,045              | 1,000                               |
|                          | Quadratisch | Linear | 304,861              | 1,000                               |
| Fehler(Arrangement*Pace) | Linear      | Linear |                      |                                     |
|                          | Quadratisch | Linear |                      |                                     |

a. Unter Verwendung von Alpha = ,05 berechnet

### Tests der Zwischensubjekteffekte

Maß: MEASURE\_1

Transformierte Variable: Mittel

| Quelle          | Quadratsumme<br>vom Typ III | df | Mittel der<br>Quadrate | F        | Sig. |
|-----------------|-----------------------------|----|------------------------|----------|------|
| Konstanter Term | 210842513,0                 | 1  | 210842513,0            | 4378,011 | ,000 |
| Fehler          | 4478827,240                 | 93 | 48159,433              |          |      |

### Tests der Zwischensubjekteffekte

Maß: MEASURE\_1

Transformierte Variable: Mittel

| Quelle          | Partielles Eta-<br>Quadrat | Dezent.<br>Parameter | Beobachtete<br>Schärfe <sup>a</sup> |
|-----------------|----------------------------|----------------------|-------------------------------------|
| Konstanter Term | ,979                       | 4378,011             | 1,000                               |
| Fehler          |                            |                      |                                     |

a. Unter Verwendung von Alpha = ,05 berechnet

### Geschätzte Randmittel

## 1. Gesamtmittelwert

Maß: MEASURE\_1

| Mittelwert | Standard Fehler | 95%-Konfidenzintervall |            |
|------------|-----------------|------------------------|------------|
|            |                 | Untergrenze            | Obergrenze |
| 611,420    | 9,241           | 593,070                | 629,770    |

## 2. Arrangement

### Schätzer

Maß: MEASURE\_1

| Arrangement | Mittelwert | Standard Fehler | 95%-Konfidenzintervall |            |
|-------------|------------|-----------------|------------------------|------------|
|             |            |                 | Untergrenze            | Obergrenze |
| 1           | 666,633    | 9,086           | 648,591                | 684,676    |
| 2           | 663,894    | 8,773           | 646,473                | 681,315    |
| 3           | 503,732    | 11,714          | 480,470                | 526,995    |

### Paarweise Vergleiche

Maß: MEASURE\_1

| (I)Arrangement | (J)Arrangement | Mittlere Differenz (I-J) | Standard Fehler | Sig. <sup>b</sup> | 95% Konfidenzintervall<br>Untergrenze |
|----------------|----------------|--------------------------|-----------------|-------------------|---------------------------------------|
| 1              | 2              | 2,739                    | 4,168           | 1,000             | -7,421                                |
|                | 3              | 162,901 <sup>*</sup>     | 7,315           | ,000              | 145,067                               |
| 2              | 1              | -2,739                   | 4,168           | 1,000             | -12,900                               |
|                | 3              | 160,161 <sup>*</sup>     | 7,129           | ,000              | 142,779                               |
| 3              | 1              | -162,901 <sup>*</sup>    | 7,315           | ,000              | -180,734                              |
|                | 2              | -160,161 <sup>*</sup>    | 7,129           | ,000              | -177,543                              |

### Paarweise Vergleiche

Maß: MEASURE\_1

| (I)Arrangement | (J)Arrangement | 95% Konfidenzintervall<br>Obergrenze |
|----------------|----------------|--------------------------------------|
| 1              | 2              | 12,900                               |
|                | 3              | 180,734                              |
| 2              | 1              | 7,421                                |
|                | 3              | 177,543                              |
| 3              | 1              | -145,067                             |
|                | 2              | -142,779                             |

Basiert auf den geschätzten Randmitteln

\*. Die mittlere Differenz ist auf dem ,05-Niveau signifikant.

b. Anpassung für Mehrfachvergleiche: Bonferroni.

### Multivariate Tests

|                                          | Wert  | F                    | Hypothese df | Fehler df | Sig. |
|------------------------------------------|-------|----------------------|--------------|-----------|------|
| Pillai-Spur                              | ,854  | 269,950 <sup>a</sup> | 2,000        | 92,000    | ,000 |
| Wilks-Lambda                             | ,146  | 269,950 <sup>a</sup> | 2,000        | 92,000    | ,000 |
| Hotelling-Spur                           | 5,868 | 269,950 <sup>a</sup> | 2,000        | 92,000    | ,000 |
| Größte charakteristische Wurzel nach Roy | 5,868 | 269,950 <sup>a</sup> | 2,000        | 92,000    | ,000 |

### Multivariate Tests

|                                          | Partielles Eta-Quadrat | Dezent. Parameter | Beobachtete Schärfe <sup>b</sup> |
|------------------------------------------|------------------------|-------------------|----------------------------------|
| Pillai-Spur                              | ,854                   | 539,900           | 1,000                            |
| Wilks-Lambda                             | ,854                   | 539,900           | 1,000                            |
| Hotelling-Spur                           | ,854                   | 539,900           | 1,000                            |
| Größte charakteristische Wurzel nach Roy | ,854                   | 539,900           | 1,000                            |

Jedes F prüft den multivariaten Effekt von Arrangement. Diese Tests basieren auf den linear unabhängigen paarweisen Vergleichen zwischen den geschätzten Randmitteln.

a. Exakte Statistik

b. Unter Verwendung von Alpha = ,05 berechnet

## 3. Pace

### Schätzer

Maß: MEASURE\_1

| Pace | Mittelwert | Standard Fehler | 95%-Konfidenzintervall |            |
|------|------------|-----------------|------------------------|------------|
|      |            |                 | Untergrenze            | Obergrenze |
| 1    | 535,414    | 9,269           | 517,008                | 553,819    |
| 2    | 687,426    | 9,766           | 668,034                | 706,819    |

## Paarweise Vergleiche

Maß: MEASURE\_1

| (I)Pace | (J)Pace | Mittlere Differenz (I-J) | Standard Fehler | Sig. <sup>b</sup> | 95% Konfidenzintervall für die Differenz <sup>b</sup> |            |
|---------|---------|--------------------------|-----------------|-------------------|-------------------------------------------------------|------------|
|         |         |                          |                 |                   | Untergrenze                                           | Obergrenze |
| 1       | 2       | -152,013 <sup>*</sup>    | 4,582           | ,000              | -161,111                                              | -142,915   |
| 2       | 1       | 152,013 <sup>*</sup>     | 4,582           | ,000              | 142,915                                               | 161,111    |

Basiert auf den geschätzten Randmitteln

\*. Die mittlere Differenz ist auf dem ,05-Niveau signifikant.

b. Anpassung für Mehrfachvergleiche: Bonferroni.

## Multivariate Tests

|                                          | Wert   | F                     | Hypothese df | Fehler df | Sig. |
|------------------------------------------|--------|-----------------------|--------------|-----------|------|
| Pillai-Spur                              | ,922   | 1100,875 <sup>a</sup> | 1,000        | 93,000    | ,000 |
| Wilks-Lambda                             | ,078   | 1100,875 <sup>a</sup> | 1,000        | 93,000    | ,000 |
| Hotelling-Spur                           | 11,837 | 1100,875 <sup>a</sup> | 1,000        | 93,000    | ,000 |
| Größte charakteristische Wurzel nach Roy | 11,837 | 1100,875 <sup>a</sup> | 1,000        | 93,000    | ,000 |

## Multivariate Tests

|                                          | Partielles Eta-Quadrat | Dezent. Parameter | Beobachtete Schärfe <sup>b</sup> |
|------------------------------------------|------------------------|-------------------|----------------------------------|
| Pillai-Spur                              | ,922                   | 1100,875          | 1,000                            |
| Wilks-Lambda                             | ,922                   | 1100,875          | 1,000                            |
| Hotelling-Spur                           | ,922                   | 1100,875          | 1,000                            |
| Größte charakteristische Wurzel nach Roy | ,922                   | 1100,875          | 1,000                            |

Jedes F prüft den multivariaten Effekt von Pace. Diese Tests basieren auf den linear unabhängigen paarweisen Vergleichen zwischen den geschätzten Randmitteln.

a. Exakte Statistik

b. Unter Verwendung von Alpha = ,05 berechnet

#### 4. Arrangement \* Pace

Maß: MEASURE\_1

| Arrangement | Pace | Mittelwert | Standard Fehler | 95%-Konfidenzintervall |            |
|-------------|------|------------|-----------------|------------------------|------------|
|             |      |            |                 | Untergrenze            | Obergrenze |
| 1           | 1    | 631,450    | 9,305           | 612,972                | 649,928    |
|             | 2    | 701,817    | 9,824           | 682,309                | 721,324    |
| 2           | 1    | 622,504    | 8,706           | 605,216                | 639,793    |
|             | 2    | 705,283    | 9,606           | 686,208                | 724,359    |
| 3           | 1    | 352,286    | 12,760          | 326,947                | 377,626    |
|             | 2    | 655,179    | 12,117          | 631,117                | 679,240    |

#### Profildigramm

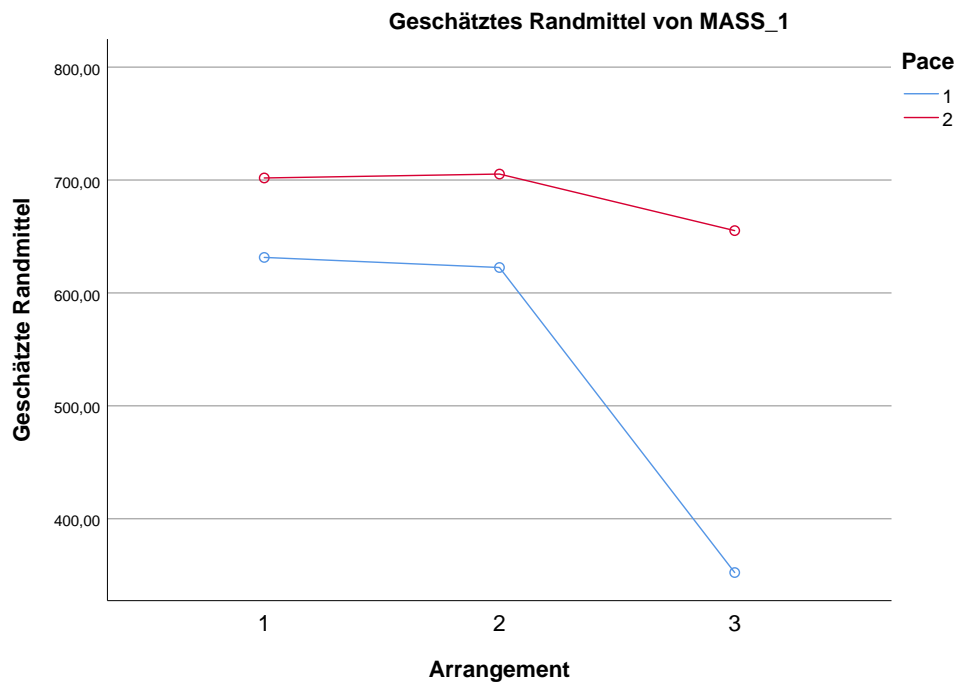

\*\*\* Repeated-measures ANOVA (stimulus arrangement + pace) for error rates in the modified d2.

```
GLM sb1_ErrPerc snb1_ErrPerc tbn1_ErrPerc rbn1_ErrPerc rnb1_ErrPerc
  /WSFACTOR=Arrangement 3 Polynomial Pace 2 Polynomial
  /METHOD=SSTYPE(3)
  /PLOT=PROFILE(Arrangement*Pace) TYPE=LINE ERRORBAR=NO MEANREFERENCE=NO YAXIS=AUTO
```

```

/EMMEANS=TABLES(OVERALL)
/EMMEANS=TABLES(Arrangement) COMPARE ADJ(BONFERRONI)
/EMMEANS=TABLES(Pace) COMPARE ADJ(BONFERRONI)
/EMMEANS=TABLES(Arrangement*Pace)
/PRINT=DESCRIPTIVE ETASQ OPOWER
/CRITERIA=ALPHA(.05)
/WSDESIGN=Arrangement Pace Arrangement*Pace.

```

## Allgemeines Lineares Modell

### Anmerkungen

|                            |                                       |                                                                                         |
|----------------------------|---------------------------------------|-----------------------------------------------------------------------------------------|
| Ausgabe erstellt           |                                       | 02-MAR-2019 10:14:13                                                                    |
| Kommentare                 |                                       |                                                                                         |
| Eingabe                    | Daten                                 | C:<br>\Users\Iris\Desktop\Resubmission_EJPA\ESM_PreviewBenefit_DATA.sav                 |
|                            | Aktiver Datensatz                     | DataSet1                                                                                |
|                            | Filter                                | <keine>                                                                                 |
|                            | Gewichtung                            | <keine>                                                                                 |
|                            | Aufgeteilte Datei                     | <keine>                                                                                 |
|                            | Anzahl der Zeilen in der Arbeitsdatei | 100                                                                                     |
| Behandlung fehlender Werte | Definition für "fehlend"              | Benutzerdefinierte fehlende Werte werden als fehlend behandelt.                         |
|                            | Verwendete Fälle                      | Die Statistik basiert auf allen Fällen mit gültigen Daten für alle Variablen im Modell. |



## Anmerkungen

|            |                                                                                                                                                                                                                                                                                                                                                                                                                                                                                                                                |             |
|------------|--------------------------------------------------------------------------------------------------------------------------------------------------------------------------------------------------------------------------------------------------------------------------------------------------------------------------------------------------------------------------------------------------------------------------------------------------------------------------------------------------------------------------------|-------------|
| Syntax     | <pre> GLM sb1_ErrPerc snb1_ErrPerc tb1_ErrPerc tnb1_ErrPerc rb1_ErrPerc rnb1_ErrPerc  /WSFACTOR=Arrangeme nt 3 Polynomial Pace 2 Polynomial /METHOD=SSTYPE(3) /PLOT=PROFILE (Arrangement*Pace) TYPE=LINE ERRORBAR=NO MEANREFERENCE=NO YAXIS=AUTO /EMMEANS=TABLES (OVERALL) /EMMEANS=TABLES (Arrangement) COMPARE ADJ(BONFERRONI) /EMMEANS=TABLES (Pace) COMPARE ADJ (BONFERRONI) /EMMEANS=TABLES (Arrangement*Pace) /PRINT=DESCRIPTIVE ETASQ OPOWER /CRITERIA=ALPHA(.05)  /WSDESIGN=Arrangemen t Pace Arrangement*Pace. </pre> |             |
| Ressourcen | Prozessorzeit                                                                                                                                                                                                                                                                                                                                                                                                                                                                                                                  | 00:00:00,69 |
|            | Verstrichene Zeit                                                                                                                                                                                                                                                                                                                                                                                                                                                                                                              | 00:00:00,38 |

### Innersubjektfaktoren

Maß: MEASURE\_1

| Arrangement | Pace | Abhängige Variable |
|-------------|------|--------------------|
| 1           | 1    | sb1_ErrPerc        |
|             | 2    | snb1_ErrPerc       |
| 2           | 1    | tb1_ErrPerc        |
|             | 2    | tnb1_ErrPerc       |
| 3           | 1    | rb1_ErrPerc        |
|             | 2    | rnb1_ErrPerc       |

## Deskriptive Statistiken

|              | Mittelwert | Std.-<br>Abweichung | N  |
|--------------|------------|---------------------|----|
| sb1_ErrPerc  | 4,5612     | 3,40337             | 94 |
| snb1_ErrPerc | 4,1090     | 3,05429             | 94 |
| tb1_ErrPerc  | 4,7872     | 3,28240             | 94 |
| tnb1_ErrPerc | 3,5106     | 3,13387             | 94 |
| rb1_ErrPerc  | 2,6862     | 2,49298             | 94 |
| rnb1_ErrPerc | 4,8404     | 3,69918             | 94 |

## Multivariate Tests<sup>a</sup>

| Effekt             |                                             | Wert | F                   | Hypothese df | Fehler df |
|--------------------|---------------------------------------------|------|---------------------|--------------|-----------|
| Arrangement        | Pillai-Spur                                 | ,044 | 2,130 <sup>b</sup>  | 2,000        | 92,000    |
|                    | Wilks-Lambda                                | ,956 | 2,130 <sup>b</sup>  | 2,000        | 92,000    |
|                    | Hotelling-Spur                              | ,046 | 2,130 <sup>b</sup>  | 2,000        | 92,000    |
|                    | Größte charakteristische<br>Wurzel nach Roy | ,046 | 2,130 <sup>b</sup>  | 2,000        | 92,000    |
| Pace               | Pillai-Spur                                 | ,004 | ,402 <sup>b</sup>   | 1,000        | 93,000    |
|                    | Wilks-Lambda                                | ,996 | ,402 <sup>b</sup>   | 1,000        | 93,000    |
|                    | Hotelling-Spur                              | ,004 | ,402 <sup>b</sup>   | 1,000        | 93,000    |
|                    | Größte charakteristische<br>Wurzel nach Roy | ,004 | ,402 <sup>b</sup>   | 1,000        | 93,000    |
| Arrangement * Pace | Pillai-Spur                                 | ,371 | 27,109 <sup>b</sup> | 2,000        | 92,000    |
|                    | Wilks-Lambda                                | ,629 | 27,109 <sup>b</sup> | 2,000        | 92,000    |
|                    | Hotelling-Spur                              | ,589 | 27,109 <sup>b</sup> | 2,000        | 92,000    |
|                    | Größte charakteristische<br>Wurzel nach Roy | ,589 | 27,109 <sup>b</sup> | 2,000        | 92,000    |

### Multivariate Tests<sup>a</sup>

| Effekt             |                                             | Sig. | Partielles Eta-<br>Quadrat | Dezentr.<br>Parameter |
|--------------------|---------------------------------------------|------|----------------------------|-----------------------|
| Arrangement        | Pillai-Spur                                 | ,125 | ,044                       | 4,260                 |
|                    | Wilks-Lambda                                | ,125 | ,044                       | 4,260                 |
|                    | Hotelling-Spur                              | ,125 | ,044                       | 4,260                 |
|                    | Größte charakteristische<br>Wurzel nach Roy | ,125 | ,044                       | 4,260                 |
| Pace               | Pillai-Spur                                 | ,528 | ,004                       | ,402                  |
|                    | Wilks-Lambda                                | ,528 | ,004                       | ,402                  |
|                    | Hotelling-Spur                              | ,528 | ,004                       | ,402                  |
|                    | Größte charakteristische<br>Wurzel nach Roy | ,528 | ,004                       | ,402                  |
| Arrangement * Pace | Pillai-Spur                                 | ,000 | ,371                       | 54,218                |
|                    | Wilks-Lambda                                | ,000 | ,371                       | 54,218                |
|                    | Hotelling-Spur                              | ,000 | ,371                       | 54,218                |
|                    | Größte charakteristische<br>Wurzel nach Roy | ,000 | ,371                       | 54,218                |

### Multivariate Tests<sup>a</sup>

| Effekt             |                                             | Beobachtete<br>Schärfe <sup>c</sup> |
|--------------------|---------------------------------------------|-------------------------------------|
| Arrangement        | Pillai-Spur                                 | ,427                                |
|                    | Wilks-Lambda                                | ,427                                |
|                    | Hotelling-Spur                              | ,427                                |
|                    | Größte charakteristische<br>Wurzel nach Roy | ,427                                |
| Pace               | Pillai-Spur                                 | ,096                                |
|                    | Wilks-Lambda                                | ,096                                |
|                    | Hotelling-Spur                              | ,096                                |
|                    | Größte charakteristische<br>Wurzel nach Roy | ,096                                |
| Arrangement * Pace | Pillai-Spur                                 | 1,000                               |
|                    | Wilks-Lambda                                | 1,000                               |
|                    | Hotelling-Spur                              | 1,000                               |
|                    | Größte charakteristische<br>Wurzel nach Roy | 1,000                               |

- a. Design: Konstanter Term  
Innersubjektdesign: Arrangement + Pace + Arrangement \* Pace
- b. Exakte Statistik
- c. Unter Verwendung von Alpha = ,05 berechnet

### Mauchly-Test auf Sphärizität<sup>a</sup>

Maß: MEASURE\_1

| Innersubjekteffekt | Mauchly-W | Approx. Chi-<br>Quadrat | df | Sig. | Epsilon <sup>b</sup><br>Greenhouse-<br>Geisser |
|--------------------|-----------|-------------------------|----|------|------------------------------------------------|
| Arrangement        | ,973      | 2,536                   | 2  | ,281 | ,974                                           |
| Pace               | 1,000     | ,000                    | 0  | .    | 1,000                                          |
| Arrangement * Pace | ,983      | 1,567                   | 2  | ,457 | ,983                                           |

### Mauchly-Test auf Sphärizität<sup>a</sup>

Maß: MEASURE\_1

| Innersubjekteffekt | Epsilon <sup>b</sup> |             |
|--------------------|----------------------|-------------|
|                    | Huynh-Feldt          | Untergrenze |
| Arrangement        | ,994                 | ,500        |
| Pace               | 1,000                | 1,000       |
| Arrangement * Pace | 1,000                | ,500        |

Prüft die Nullhypothese, daß sich die Fehlerkovarianz-Matrix der orthonormalisierten transformierten abhängigen Variablen proportional zur Einheitsmatrix verhält.

a. Design: Konstanter Term

Innersubjekt-design: Arrangement + Pace + Arrangement \* Pace

b. Kann zum Korrigieren der Freiheitsgrade für die gemittelten Signifikanztests verwendet werden. In der Tabelle mit den Tests der Effekte innerhalb der Subjekte werden korrigierte Tests angezeigt.

## Tests der Innersubjekteffekte

Maß: MEASURE\_1

| Quelle                   |                        | Quadratsumme<br>vom Typ III | df      | Mittel der<br>Quadrate |
|--------------------------|------------------------|-----------------------------|---------|------------------------|
| Arrangement              | Sphärizität angenommen | 31,981                      | 2       | 15,991                 |
|                          | Greenhouse-Geisser     | 31,981                      | 1,947   | 16,425                 |
|                          | Huynh-Feldt            | 31,981                      | 1,988   | 16,086                 |
|                          | Untergrenze            | 31,981                      | 1,000   | 31,981                 |
| Fehler(Arrangement)      | Sphärizität angenommen | 1195,623                    | 186     | 6,428                  |
|                          | Greenhouse-Geisser     | 1195,623                    | 181,076 | 6,603                  |
|                          | Huynh-Feldt            | 1195,623                    | 184,894 | 6,467                  |
|                          | Untergrenze            | 1195,623                    | 93,000  | 12,856                 |
| Pace                     | Sphärizität angenommen | 2,837                       | 1       | 2,837                  |
|                          | Greenhouse-Geisser     | 2,837                       | 1,000   | 2,837                  |
|                          | Huynh-Feldt            | 2,837                       | 1,000   | 2,837                  |
|                          | Untergrenze            | 2,837                       | 1,000   | 2,837                  |
| Fehler(Pace)             | Sphärizität angenommen | 657,059                     | 93      | 7,065                  |
|                          | Greenhouse-Geisser     | 657,059                     | 93,000  | 7,065                  |
|                          | Huynh-Feldt            | 657,059                     | 93,000  | 7,065                  |
|                          | Untergrenze            | 657,059                     | 93,000  | 7,065                  |
| Arrangement * Pace       | Sphärizität angenommen | 301,485                     | 2       | 150,742                |
|                          | Greenhouse-Geisser     | 301,485                     | 1,967   | 153,289                |
|                          | Huynh-Feldt            | 301,485                     | 2,000   | 150,742                |
|                          | Untergrenze            | 301,485                     | 1,000   | 301,485                |
| Fehler(Arrangement*Pace) | Sphärizität angenommen | 907,369                     | 186     | 4,878                  |
|                          | Greenhouse-Geisser     | 907,369                     | 182,911 | 4,961                  |
|                          | Huynh-Feldt            | 907,369                     | 186,000 | 4,878                  |
|                          | Untergrenze            | 907,369                     | 93,000  | 9,757                  |

## Tests der Innersubjekteffekte

Maß: MEASURE\_1

| Quelle                   |                        | F      | Sig. | Partielles Eta-Quadrat |
|--------------------------|------------------------|--------|------|------------------------|
| Arrangement              | Sphärizität angenommen | 2,488  | ,086 | ,026                   |
|                          | Greenhouse-Geisser     | 2,488  | ,087 | ,026                   |
|                          | Huynh-Feldt            | 2,488  | ,086 | ,026                   |
|                          | Untergrenze            | 2,488  | ,118 | ,026                   |
| Fehler(Arrangement)      | Sphärizität angenommen |        |      |                        |
|                          | Greenhouse-Geisser     |        |      |                        |
|                          | Huynh-Feldt            |        |      |                        |
|                          | Untergrenze            |        |      |                        |
| Pace                     | Sphärizität angenommen | ,402   | ,528 | ,004                   |
|                          | Greenhouse-Geisser     | ,402   | ,528 | ,004                   |
|                          | Huynh-Feldt            | ,402   | ,528 | ,004                   |
|                          | Untergrenze            | ,402   | ,528 | ,004                   |
| Fehler(Pace)             | Sphärizität angenommen |        |      |                        |
|                          | Greenhouse-Geisser     |        |      |                        |
|                          | Huynh-Feldt            |        |      |                        |
|                          | Untergrenze            |        |      |                        |
| Arrangement * Pace       | Sphärizität angenommen | 30,900 | ,000 | ,249                   |
|                          | Greenhouse-Geisser     | 30,900 | ,000 | ,249                   |
|                          | Huynh-Feldt            | 30,900 | ,000 | ,249                   |
|                          | Untergrenze            | 30,900 | ,000 | ,249                   |
| Fehler(Arrangement*Pace) | Sphärizität angenommen |        |      |                        |
|                          | Greenhouse-Geisser     |        |      |                        |
|                          | Huynh-Feldt            |        |      |                        |
|                          | Untergrenze            |        |      |                        |

## Tests der Innersubjekteffekte

Maß: MEASURE\_1

| Quelle                   |                        | Dezentr.<br>Parameter | Beobachtete<br>Schärfe <sup>a</sup> |
|--------------------------|------------------------|-----------------------|-------------------------------------|
| Arrangement              | Sphärizität angenommen | 4,975                 | ,495                                |
|                          | Greenhouse-Geisser     | 4,844                 | ,488                                |
|                          | Huynh-Feldt            | 4,946                 | ,493                                |
|                          | Untergrenze            | 2,488                 | ,345                                |
| Fehler(Arrangement)      | Sphärizität angenommen |                       |                                     |
|                          | Greenhouse-Geisser     |                       |                                     |
|                          | Huynh-Feldt            |                       |                                     |
|                          | Untergrenze            |                       |                                     |
| Pace                     | Sphärizität angenommen | ,402                  | ,096                                |
|                          | Greenhouse-Geisser     | ,402                  | ,096                                |
|                          | Huynh-Feldt            | ,402                  | ,096                                |
|                          | Untergrenze            | ,402                  | ,096                                |
| Fehler(Pace)             | Sphärizität angenommen |                       |                                     |
|                          | Greenhouse-Geisser     |                       |                                     |
|                          | Huynh-Feldt            |                       |                                     |
|                          | Untergrenze            |                       |                                     |
| Arrangement * Pace       | Sphärizität angenommen | 61,801                | 1,000                               |
|                          | Greenhouse-Geisser     | 60,774                | 1,000                               |
|                          | Huynh-Feldt            | 61,801                | 1,000                               |
|                          | Untergrenze            | 30,900                | 1,000                               |
| Fehler(Arrangement*Pace) | Sphärizität angenommen |                       |                                     |
|                          | Greenhouse-Geisser     |                       |                                     |
|                          | Huynh-Feldt            |                       |                                     |
|                          | Untergrenze            |                       |                                     |

a. Unter Verwendung von Alpha = ,05 berechnet

### Tests der Innersubjektkontraste

Maß: MEASURE\_1

| Quelle                   | Arrangement | Pace   | Quadratsumme vom Typ III | df | Mittel der Quadrate |
|--------------------------|-------------|--------|--------------------------|----|---------------------|
| Arrangement              | Linear      |        | 30,735                   | 1  | 30,735              |
|                          | Quadratisch |        | 1,247                    | 1  | 1,247               |
| Fehler(Arrangement)      | Linear      |        | 695,828                  | 93 | 7,482               |
|                          | Quadratisch |        | 499,795                  | 93 | 5,374               |
| Pace                     |             | Linear | 2,837                    | 1  | 2,837               |
| Fehler(Pace)             |             | Linear | 657,059                  | 93 | 7,065               |
| Arrangement * Pace       | Linear      | Linear | 159,641                  | 1  | 159,641             |
|                          | Quadratisch | Linear | 141,844                  | 1  | 141,844             |
| Fehler(Arrangement*Pace) | Linear      | Linear | 466,922                  | 93 | 5,021               |
|                          | Quadratisch | Linear | 440,448                  | 93 | 4,736               |

### Tests der Innersubjektkontraste

Maß: MEASURE\_1

| Quelle                   | Arrangement | Pace   | F      | Sig. | Partielles Eta-Quadrat |
|--------------------------|-------------|--------|--------|------|------------------------|
| Arrangement              | Linear      |        | 4,108  | ,046 | ,042                   |
|                          | Quadratisch |        | ,232   | ,631 | ,002                   |
| Fehler(Arrangement)      | Linear      |        |        |      |                        |
|                          | Quadratisch |        |        |      |                        |
| Pace                     |             | Linear | ,402   | ,528 | ,004                   |
| Fehler(Pace)             |             | Linear |        |      |                        |
| Arrangement * Pace       | Linear      | Linear | 31,797 | ,000 | ,255                   |
|                          | Quadratisch | Linear | 29,950 | ,000 | ,244                   |
| Fehler(Arrangement*Pace) | Linear      | Linear |        |      |                        |
|                          | Quadratisch | Linear |        |      |                        |



### Tests der Innersubjektkontraste

Maß: MEASURE\_1

| Quelle                   | Arrangement | Pace   | Dezent.<br>Parameter | Beobachtete<br>Schärfe <sup>a</sup> |
|--------------------------|-------------|--------|----------------------|-------------------------------------|
| Arrangement              | Linear      |        | 4,108                | ,518                                |
|                          | Quadratisch |        | ,232                 | ,076                                |
| Fehler(Arrangement)      | Linear      |        |                      |                                     |
|                          | Quadratisch |        |                      |                                     |
| Pace                     |             | Linear | ,402                 | ,096                                |
| Fehler(Pace)             |             | Linear |                      |                                     |
| Arrangement * Pace       | Linear      | Linear | 31,797               | 1,000                               |
|                          | Quadratisch | Linear | 29,950               | 1,000                               |
| Fehler(Arrangement*Pace) | Linear      | Linear |                      |                                     |
|                          | Quadratisch | Linear |                      |                                     |

a. Unter Verwendung von Alpha = ,05 berechnet

### Tests der Zwischensubjekteffekte

Maß: MEASURE\_1

Transformierte Variable: Mittel

| Quelle          | Quadratsumme<br>vom Typ III | df | Mittel der<br>Quadrate | F       | Sig. |
|-----------------|-----------------------------|----|------------------------|---------|------|
| Konstanter Term | 9399,834                    | 1  | 9399,834               | 296,265 | ,000 |
| Fehler          | 2950,687                    | 93 | 31,728                 |         |      |

### Tests der Zwischensubjekteffekte

Maß: MEASURE\_1

Transformierte Variable: Mittel

| Quelle          | Partielles Eta-<br>Quadrat | Dezent.<br>Parameter | Beobachtete<br>Schärfe <sup>a</sup> |
|-----------------|----------------------------|----------------------|-------------------------------------|
| Konstanter Term | ,761                       | 296,265              | 1,000                               |
| Fehler          |                            |                      |                                     |

a. Unter Verwendung von Alpha = ,05 berechnet

### Geschätzte Randmittel

## 1. Gesamtmittelwert

Maß: MEASURE\_1

| Mittelwert | Standard Fehler | 95%-Konfidenzintervall |            |
|------------|-----------------|------------------------|------------|
|            |                 | Untergrenze            | Obergrenze |
| 4,082      | ,237            | 3,611                  | 4,553      |

## 2. Arrangement

### Schätzer

Maß: MEASURE\_1

| Arrangement | Mittelwert | Standard Fehler | 95%-Konfidenzintervall |            |
|-------------|------------|-----------------|------------------------|------------|
|             |            |                 | Untergrenze            | Obergrenze |
| 1           | 4,335      | ,291            | 3,757                  | 4,913      |
| 2           | 4,149      | ,287            | 3,579                  | 4,719      |
| 3           | 3,763      | ,265            | 3,238                  | 4,289      |

### Paarweise Vergleiche

Maß: MEASURE\_1

| (I)Arrangement | (J)Arrangement | Mittlere Differenz (I-J) | Standard Fehler | Sig. <sup>a</sup> | 95% Konfidenzintervall<br>Untergrenze |
|----------------|----------------|--------------------------|-----------------|-------------------|---------------------------------------|
| 1              | 2              | ,186                     | ,248            | 1,000             | -,420                                 |
|                | 3              | ,572                     | ,282            | ,137              | -,116                                 |
| 2              | 1              | -,186                    | ,248            | 1,000             | -,792                                 |
|                | 3              | ,386                     | ,253            | ,391              | -,230                                 |
| 3              | 1              | -,572                    | ,282            | ,137              | -1,260                                |
|                | 2              | -,386                    | ,253            | ,391              | -1,002                                |

### Paarweise Vergleiche

Maß: MEASURE\_1

| (I)Arrangement | (J)Arrangement | 95% Konfidenzintervall |
|----------------|----------------|------------------------|
|                |                | Obergrenze             |
| 1              | 2              | ,792                   |
|                | 3              | 1,260                  |
| 2              | 1              | ,420                   |
|                | 3              | 1,002                  |
| 3              | 1              | ,116                   |
|                | 2              | ,230                   |

Basiert auf den geschätzten Randmitteln

a. Anpassung für Mehrfachvergleiche: Bonferroni.

### Multivariate Tests

|                                          | Wert | F                  | Hypothese df | Fehler df | Sig. |
|------------------------------------------|------|--------------------|--------------|-----------|------|
| Pillai-Spur                              | ,044 | 2,130 <sup>a</sup> | 2,000        | 92,000    | ,125 |
| Wilks-Lambda                             | ,956 | 2,130 <sup>a</sup> | 2,000        | 92,000    | ,125 |
| Hotelling-Spur                           | ,046 | 2,130 <sup>a</sup> | 2,000        | 92,000    | ,125 |
| Größte charakteristische Wurzel nach Roy | ,046 | 2,130 <sup>a</sup> | 2,000        | 92,000    | ,125 |

### Multivariate Tests

|                                          | Partielles Eta-Quadrat | Dezent. Parameter | Beobachtete Schärfe <sup>b</sup> |
|------------------------------------------|------------------------|-------------------|----------------------------------|
| Pillai-Spur                              | ,044                   | 4,260             | ,427                             |
| Wilks-Lambda                             | ,044                   | 4,260             | ,427                             |
| Hotelling-Spur                           | ,044                   | 4,260             | ,427                             |
| Größte charakteristische Wurzel nach Roy | ,044                   | 4,260             | ,427                             |

Jedes F prüft den multivariaten Effekt von Arrangement. Diese Tests basieren auf den linear unabhängigen paarweisen Vergleichen zwischen den geschätzten Randmitteln.

- a. Exakte Statistik
- b. Unter Verwendung von Alpha = ,05 berechnet

## 3. Pace

### Schätzer

Maß: MEASURE\_1

| Pace | Mittelwert | Standard Fehler | 95%-Konfidenzintervall |            |
|------|------------|-----------------|------------------------|------------|
|      |            |                 | Untergrenze            | Obergrenze |
| 1    | 4,012      | ,249            | 3,516                  | 4,507      |
| 2    | 4,153      | ,275            | 3,608                  | 4,699      |

### Paarweise Vergleiche

Maß: MEASURE\_1

| (I)Pace | (J)Pace | Mittlere Differenz (I-J) | Standard Fehler | Sig. <sup>a</sup> | 95% Konfidenzintervall für die Differenz <sup>a</sup> |            |
|---------|---------|--------------------------|-----------------|-------------------|-------------------------------------------------------|------------|
|         |         |                          |                 |                   | Untergrenze                                           | Obergrenze |
| 1       | 2       | -,142                    | ,224            | ,528              | -,586                                                 | ,303       |
| 2       | 1       | ,142                     | ,224            | ,528              | -,303                                                 | ,586       |

Basiert auf den geschätzten Randmitteln

- a. Anpassung für Mehrfachvergleiche: Bonferroni.

### Multivariate Tests

|                                          | Wert | F                 | Hypothese df | Fehler df | Sig. |
|------------------------------------------|------|-------------------|--------------|-----------|------|
| Pillai-Spur                              | ,004 | ,402 <sup>a</sup> | 1,000        | 93,000    | ,528 |
| Wilks-Lambda                             | ,996 | ,402 <sup>a</sup> | 1,000        | 93,000    | ,528 |
| Hotelling-Spur                           | ,004 | ,402 <sup>a</sup> | 1,000        | 93,000    | ,528 |
| Größte charakteristische Wurzel nach Roy | ,004 | ,402 <sup>a</sup> | 1,000        | 93,000    | ,528 |

### Multivariate Tests

|                                          | Partielles Eta-Quadrat | Dezent. Parameter | Beobachtete Schärfe <sup>b</sup> |
|------------------------------------------|------------------------|-------------------|----------------------------------|
| Pillai-Spur                              | ,004                   | ,402              | ,096                             |
| Wilks-Lambda                             | ,004                   | ,402              | ,096                             |
| Hotelling-Spur                           | ,004                   | ,402              | ,096                             |
| Größte charakteristische Wurzel nach Roy | ,004                   | ,402              | ,096                             |

Jedes F prüft den multivariaten Effekt von Pace. Diese Tests basieren auf den linear unabhängigen paarweisen Vergleichen zwischen den geschätzten Randmitteln.

- a. Exakte Statistik
- b. Unter Verwendung von Alpha = ,05 berechnet

### 4. Arrangement \* Pace

Maß: MEASURE\_1

| Arrangement | Pace | Mittelwert | Standard Fehler | 95%-Konfidenzintervall |            |
|-------------|------|------------|-----------------|------------------------|------------|
|             |      |            |                 | Untergrenze            | Obergrenze |
| 1           | 1    | 4,561      | ,351            | 3,864                  | 5,258      |
|             | 2    | 4,109      | ,315            | 3,483                  | 4,735      |
| 2           | 1    | 4,787      | ,339            | 4,115                  | 5,460      |
|             | 2    | 3,511      | ,323            | 2,869                  | 4,153      |
| 3           | 1    | 2,686      | ,257            | 2,176                  | 3,197      |
|             | 2    | 4,840      | ,382            | 4,083                  | 5,598      |

### Profildigramm

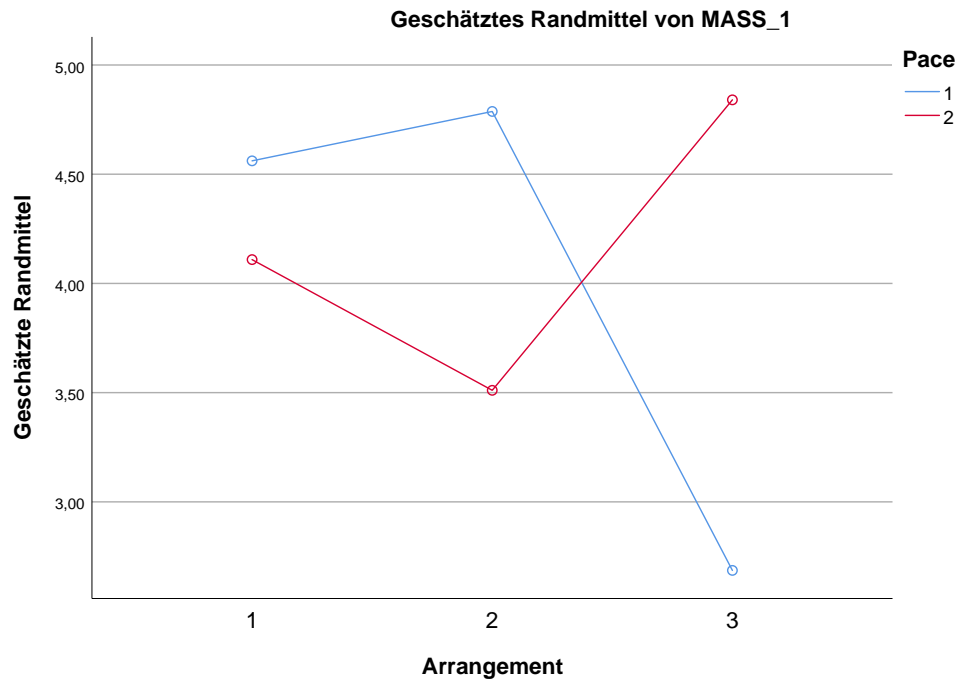

\*\*\*Compute indices.

```
COMPUTE FOC_1_Descr= t1_RT - s1_RT.
EXECUTE.
```

```
COMPUTE PRE_1_Descr=r1_RT - t1_RT.
EXECUTE.
```

```
COMPUTE FOC_1=lg_s1_RT - lg_t1_RT.
EXECUTE.
```

```
COMPUTE PRE_1=lg_t1_RT - lg_r1_RT.
EXECUTE.
```

\*\*\*Descriptives for indices and sustained attention tests.

```
DESCRIPTIVES VARIABLES=FOC_1_Descr PRE_1_Descr d2_KL REV BIS_UW BIS_KW BIS_
TG
  /STATISTICS=MEAN STDDEV MIN MAX.
```

## Deskriptive Statistik

## Anmerkungen

|                            |                                       |                                                                                                                      |
|----------------------------|---------------------------------------|----------------------------------------------------------------------------------------------------------------------|
| Ausgabe erstellt           |                                       | 02-MAR-2019 10:14:14                                                                                                 |
| Kommentare                 |                                       |                                                                                                                      |
| Eingabe                    | Daten                                 | C:<br>\Users\Iris\Desktop\Resubmission_EJPA\ESM_PreviewBenefit_DATA.sav                                              |
|                            | Aktiver Datensatz                     | DataSet1                                                                                                             |
|                            | Filter                                | <keine>                                                                                                              |
|                            | Gewichtung                            | <keine>                                                                                                              |
|                            | Aufgeteilte Datei                     | <keine>                                                                                                              |
|                            | Anzahl der Zeilen in der Arbeitsdatei | 100                                                                                                                  |
| Behandlung fehlender Werte | Definition von fehlenden Werten       | Benutzerdefinierte fehlende Werte werden als Fehlend behandelt.                                                      |
|                            | Verwendete Fälle                      | Alle nicht fehlenden Daten werden verwendet.                                                                         |
| Syntax                     |                                       | DESCRIPTIVES<br>VARIABLES=FOC_1_Descr PRE_1_Descr d2_KL REV BIS_UW BIS_KW BIS_TG<br>/STATISTICS=MEAN STDDEV MIN MAX. |
| Ressourcen                 | Prozessorzeit                         | 00:00:00,02                                                                                                          |
|                            | Verstrichene Zeit                     | 00:00:00,02                                                                                                          |

## Deskriptive Statistik

|                             | N   | Minimum | Maximum | Mittelwert | Std.-<br>Abweichung |
|-----------------------------|-----|---------|---------|------------|---------------------|
| FOC_1_Descr                 | 97  | -110,77 | 105,41  | -4,1713    | 41,31362            |
| PRE_1_Descr                 | 94  | -306,32 | 52,65   | -160,1614  | 69,12274            |
| d2_KL                       | 100 | 130,00  | 292,00  | 220,0600   | 33,90147            |
| REV                         | 100 | 222,00  | 570,00  | 390,0300   | 74,02367            |
| BIS_UW                      | 100 | 18,00   | 57,00   | 34,7500    | 8,69735             |
| BIS_KW                      | 100 | 9,00    | 41,00   | 25,1700    | 5,70850             |
| BIS_TG                      | 100 | 7,00    | 21,00   | 14,9000    | 2,52463             |
| Gültige Werte (Listenweise) | 94  |         |         |            |                     |

\*\*\*Retest reliability for indices.

CORRELATIONS

```

/VARIABLES=FOC_1 FOC_2 PRE_1 PRE_2
/PRINT=TWOTAIL NOSIG
/MISSING=PAIRWISE.
    
```

## Korrelationen

### Anmerkungen

|                               |                                          |                                                                                                                          |
|-------------------------------|------------------------------------------|--------------------------------------------------------------------------------------------------------------------------|
| Ausgabe erstellt              |                                          | 02-MAR-2019 10:14:14                                                                                                     |
| Kommentare                    |                                          |                                                                                                                          |
| Eingabe                       | Daten                                    | C:<br>\Users\Iris\Desktop\Resub<br>mission_EJPA\ESM_Previ<br>ewBenefit_DATA.sav                                          |
|                               | Aktiver Datensatz                        | DataSet1                                                                                                                 |
|                               | Filter                                   | <keine>                                                                                                                  |
|                               | Gewichtung                               | <keine>                                                                                                                  |
|                               | Aufgeteilte Datei                        | <keine>                                                                                                                  |
|                               | Anzahl der Zeilen in der<br>Arbeitsdatei | 100                                                                                                                      |
| Behandlung fehlender<br>Werte | Definition von Fehlend                   | Benutzerdefinierte<br>fehlende Werte werden als<br>fehlend behandelt.                                                    |
|                               | Verwendete Fälle                         | Die Statistik für jedes<br>Variablenpaar basiert auf<br>allen Fällen, die gültige<br>Daten für dieses Paar<br>aufweisen. |
| Syntax                        |                                          | CORRELATIONS<br>/VARIABLES=FOC_1<br>FOC_2 PRE_1 PRE_2<br>/PRINT=TWOTAIL<br>NOSIG<br>/MISSING=PAIRWISE.                   |
| Ressourcen                    | Prozessorzeit                            | 00:00:00,16                                                                                                              |
|                               | Verstrichene Zeit                        | 00:00:00,17                                                                                                              |

## Korrelationen

|       |                          | FOC_1 | FOC_2 | PRE_1  | PRE_2  |
|-------|--------------------------|-------|-------|--------|--------|
| FOC_1 | Korrelation nach Pearson | 1     | ,238* | -,182  | -,145  |
|       | Signifikanz (2-seitig)   |       | ,019  | ,079   | ,163   |
|       | N                        | 97    | 97    | 94     | 94     |
| FOC_2 | Korrelation nach Pearson | ,238* | 1     | -,009  | -,033  |
|       | Signifikanz (2-seitig)   | ,019  |       | ,933   | ,750   |
|       | N                        | 97    | 100   | 94     | 97     |
| PRE_1 | Korrelation nach Pearson | -,182 | -,009 | 1      | ,812** |
|       | Signifikanz (2-seitig)   | ,079  | ,933  |        | ,000   |
|       | N                        | 94    | 94    | 94     | 94     |
| PRE_2 | Korrelation nach Pearson | -,145 | -,033 | ,812** | 1      |
|       | Signifikanz (2-seitig)   | ,163  | ,750  | ,000   |        |
|       | N                        | 94    | 97    | 94     | 97     |

\*. Die Korrelation ist auf dem Niveau von 0,05 (2-seitig) signifikant.

\*\*.. Die Korrelation ist auf dem Niveau von 0,01 (2-seitig) signifikant.

\*\*\*Correlations of indices and sustained attention tests.

### CORRELATIONS

```

/VARIABLES=FOC_1 PRE_1 d2_KL REV BIS_Factor BIS_UW BIS_KW BIS_TG
/PRINT=TWOTAIL NOSIG
/MISSING=PAIRWISE.

```

## Korrelationen



## Anmerkungen

|                               |                                                                                                                                            |                                                                                                                          |
|-------------------------------|--------------------------------------------------------------------------------------------------------------------------------------------|--------------------------------------------------------------------------------------------------------------------------|
| Ausgabe erstellt              |                                                                                                                                            | 02-MAR-2019 10:14:15                                                                                                     |
| Kommentare                    |                                                                                                                                            |                                                                                                                          |
| Eingabe                       | Daten                                                                                                                                      | C:<br>\Users\Iris\Desktop\Resub<br>mission_EJPA\ESM_Previ<br>ewBenefit_DATA.sav                                          |
|                               | Aktiver Datensatz                                                                                                                          | DataSet1                                                                                                                 |
|                               | Filter                                                                                                                                     | <keine>                                                                                                                  |
|                               | Gewichtung                                                                                                                                 | <keine>                                                                                                                  |
|                               | Aufgeteilte Datei                                                                                                                          | <keine>                                                                                                                  |
|                               | Anzahl der Zeilen in der<br>Arbeitsdatei                                                                                                   | 100                                                                                                                      |
| Behandlung fehlender<br>Werte | Definition von Fehlend                                                                                                                     | Benutzerdefinierte<br>fehlende Werte werden als<br>fehlend behandelt.                                                    |
|                               | Verwendete Fälle                                                                                                                           | Die Statistik für jedes<br>Variablenpaar basiert auf<br>allen Fällen, die gültige<br>Daten für dieses Paar<br>aufweisen. |
| Syntax                        | CORRELATIONS<br>/VARIABLES=FOC_1<br>PRE_1 d2_KL REV<br>BIS_Factor BIS_UW<br>BIS_KW BIS_TG<br>/PRINT=TWOTAIL<br>NOSIG<br>/MISSING=PAIRWISE. |                                                                                                                          |
| Ressourcen                    | Prozessorzeit                                                                                                                              | 00:00:00,30                                                                                                              |
|                               | Verstrichene Zeit                                                                                                                          | 00:00:00,31                                                                                                              |

### Korrelationen

|            |                          | FOC_1 | PRE_1  | d2_KL  | REV    | BIS_Factor |
|------------|--------------------------|-------|--------|--------|--------|------------|
| FOC_1      | Korrelation nach Pearson | 1     | -,182  | -,122  | -,106  | -,054      |
|            | Signifikanz (2-seitig)   |       | ,079   | ,233   | ,302   | ,598       |
|            | N                        | 97    | 94     | 97     | 97     | 97         |
| PRE_1      | Korrelation nach Pearson | -,182 | 1      | ,504** | ,352** | ,264*      |
|            | Signifikanz (2-seitig)   | ,079  |        | ,000   | ,001   | ,010       |
|            | N                        | 94    | 94     | 94     | 94     | 94         |
| d2_KL      | Korrelation nach Pearson | -,122 | ,504** | 1      | ,571** | ,442**     |
|            | Signifikanz (2-seitig)   | ,233  | ,000   |        | ,000   | ,000       |
|            | N                        | 97    | 94     | 100    | 100    | 100        |
| REV        | Korrelation nach Pearson | -,106 | ,352** | ,571** | 1      | ,656**     |
|            | Signifikanz (2-seitig)   | ,302  | ,001   | ,000   |        | ,000       |
|            | N                        | 97    | 94     | 100    | 100    | 100        |
| BIS_Factor | Korrelation nach Pearson | -,054 | ,264*  | ,442** | ,656** | 1          |
|            | Signifikanz (2-seitig)   | ,598  | ,010   | ,000   | ,000   |            |
|            | N                        | 97    | 94     | 100    | 100    | 100        |
| BIS_UW     | Korrelation nach Pearson | ,002  | ,117   | ,406** | ,574** | ,821**     |
|            | Signifikanz (2-seitig)   | ,981  | ,262   | ,000   | ,000   | ,000       |
|            | N                        | 97    | 94     | 100    | 100    | 100        |
| BIS_KW     | Korrelation nach Pearson | -,129 | ,240*  | ,411** | ,563** | ,881**     |
|            | Signifikanz (2-seitig)   | ,209  | ,020   | ,000   | ,000   | ,000       |
|            | N                        | 97    | 94     | 100    | 100    | 100        |
| BIS_TG     | Korrelation nach Pearson | ,005  | ,284** | ,258** | ,471** | ,751**     |
|            | Signifikanz (2-seitig)   | ,965  | ,006   | ,009   | ,000   | ,000       |
|            | N                        | 97    | 94     | 100    | 100    | 100        |

### Korrelationen

|            |                          | BIS_UW | BIS_KW | BIS_TG |
|------------|--------------------------|--------|--------|--------|
| FOC_1      | Korrelation nach Pearson | ,002   | -,129  | ,005   |
|            | Signifikanz (2-seitig)   | ,981   | ,209   | ,965   |
|            | N                        | 97     | 97     | 97     |
| PRE_1      | Korrelation nach Pearson | ,117   | ,240*  | ,284** |
|            | Signifikanz (2-seitig)   | ,262   | ,020   | ,006   |
|            | N                        | 94     | 94     | 94     |
| d2_KL      | Korrelation nach Pearson | ,406** | ,411** | ,258** |
|            | Signifikanz (2-seitig)   | ,000   | ,000   | ,009   |
|            | N                        | 100    | 100    | 100    |
| REV        | Korrelation nach Pearson | ,574** | ,563** | ,471** |
|            | Signifikanz (2-seitig)   | ,000   | ,000   | ,000   |
|            | N                        | 100    | 100    | 100    |
| BIS_Factor | Korrelation nach Pearson | ,821** | ,881** | ,751** |
|            | Signifikanz (2-seitig)   | ,000   | ,000   | ,000   |
|            | N                        | 100    | 100    | 100    |
| BIS_UW     | Korrelation nach Pearson | 1      | ,621** | ,380** |
|            | Signifikanz (2-seitig)   |        | ,000   | ,000   |
|            | N                        | 100    | 100    | 100    |
| BIS_KW     | Korrelation nach Pearson | ,621** | 1      | ,509** |
|            | Signifikanz (2-seitig)   | ,000   |        | ,000   |
|            | N                        | 100    | 100    | 100    |
| BIS_TG     | Korrelation nach Pearson | ,380** | ,509** | 1      |
|            | Signifikanz (2-seitig)   | ,000   | ,000   |        |
|            | N                        | 100    | 100    | 100    |

\*\* . Die Korrelation ist auf dem Niveau von 0,01 (2-seitig) signifikant.

\* . Die Korrelation ist auf dem Niveau von 0,05 (2-seitig) signifikant.
